# Supplementary material for: Urinary Protein Array Analysis to Identify Key Inflammatory Markers in Children with IgA Vasculitis Nephritis
Source: MDPI journal article supplement (doi:10.3390/children9050622), 2022-04-27
Supplement: s1 [file s1]

# Urinary protein array analysis to identify key inflammatory markers in children with IgA Vasculitis nephritis

Julien Marro<sup>1</sup>, Andrew J. Chetwynd<sup>1</sup>, Rachael D. Wright<sup>1</sup>, Silothabo Dliso<sup>2</sup>, Louise Oni<sup>1,3</sup>

<sup>1</sup>Department of Women's and Children's Health, Institute of Life Course and Medical Sciences, University of Liverpool, Liverpool, United Kingdom;

<sup>2</sup>NIHR Alder Hey Clinical Research Facility, Clinical Research Division, Alder Hey Children's NHS Foundation Trust, Liverpool, United-Kingdom

<sup>3</sup>Department of Paediatric Nephrology, Alder Hey Children's NHS Foundation Trust Hospital, Liver-pool, United Kingdom

## Supplementary materials – Tables S1-3

|                                                                                                                                                |   |
|------------------------------------------------------------------------------------------------------------------------------------------------|---|
| <b>Table S1:</b> Proteins assessed by R&Ds Systems Human Kidney Biomarker Array Kit ('Kit K') and Human XL Cytokine Array Kit ('Kit C'). ..... | 2 |
| <b>Table S2:</b> Full results: Human Kidney Biomarker Array Kit .....                                                                          | 6 |
| <b>Table S3:</b> Full results: Human XL Cytokine Array Kit .....                                                                               | 7 |

**Table S1:** Proteins assessed by R&Ds Systems Human Kidney Biomarker Array Kit ('Kit K') and Human XL Cytokine Array Kit ('Kit C').

| Name used          | Full name                                           | Alternative names                               | Assessed by |       |
|--------------------|-----------------------------------------------------|-------------------------------------------------|-------------|-------|
|                    |                                                     |                                                 | Kit K       | Kit C |
| Adiponectin        | -                                                   | Arcp30                                          | x           | x     |
| Aminopeptidase N   | -                                                   | ANPEP                                           | x           |       |
| Angiogenin         | -                                                   | -                                               |             | x     |
| Angiopoietin-1     | -                                                   | Ang1, ANGPT1                                    |             | x     |
| Angiopoietin-2     | -                                                   | Ang-2, ANGPT2                                   |             | x     |
| AGT                | Angiotensinogen                                     | Serpin A8                                       | x           |       |
| Annexin V          | -                                                   | -                                               | x           |       |
| ApoA1              | Alipoprotein A                                      | -                                               |             | x     |
| BAFF               | B-cell activating factor                            | BLyS, TNFSF13B                                  |             | x     |
| BDNF               | Brain-derived neurotrophic factor                   | Abrineurin                                      |             | x     |
| β2-Microglobulin   | -                                                   | β2M                                             | x           |       |
| C5/C5a             | Complement component C5/C5a                         | -                                               |             | x     |
| CD14               | Cluster of differentiation 14                       | -                                               |             | x     |
| CD30               | Cluster of differentiation 30                       | TNFRSF8                                         |             | x     |
| CD31               | Cluster of differentiation 31                       | PECAM-1                                         |             | x     |
| CD40 Ligand        | Cluster of differentiation 40 ligand                | CD154<br>TNFSF5                                 |             | x     |
| Chitinase-3-like-1 | -                                                   | YKL-40                                          |             | x     |
| Clusterin          | -                                                   | Apolipoprotein J                                | x           |       |
| CFD                | Complement factor D                                 | Adipsin                                         |             | x     |
| Cripto-1           | -                                                   | TDGF-1                                          |             | x     |
| CRP                | C-reactive protein                                  | -                                               |             | x     |
| CXCL16             | Chemokine (C-X-C motif) ligand 16                   | -                                               | x           |       |
| Cyr61              | Cysteine-rich angiogenic inducer 61                 | CCN1                                            | x           |       |
| Cystatin C         | -                                                   | CST3, ARMD11                                    | x           | x     |
| Dkk-1              | Dickkopf-related protein 1                          | SK, dickkopf WNT signalling pathway inhibitor 1 |             | x     |
| DPPIV              | Dipeptidyl peptidase-4                              | CD26, DPP4, Dipeptidyl-peptidase IV             | x           | x     |
| EGF                | Epidermal growth factor                             | -                                               | x           | x     |
| EGF-R              | Epidermal growth factor receptor                    | ErbB1, HER1                                     | x           |       |
| EMMPRIN            | Extracellular matrix metalloproteinase inducer      | Basigin, CD147                                  |             | x     |
| ENA-78             | Epithelial-derived neutrophil-activating peptide 78 | CXCL5                                           |             | x     |
| Endoglin           |                                                     | CD105, ENG                                      |             | x     |

|               |                                                  |                                |   |   |
|---------------|--------------------------------------------------|--------------------------------|---|---|
| L-FABP        | liver-type fatty acid-binding protein            | FABP1                          | x |   |
| Fas Ligand    |                                                  | CD95L, CD178, TNFSF6           |   | x |
| Fetuin A      |                                                  | AHSG                           | x |   |
| FGF-7         | Fibroblast growth factor 7                       | KGF                            |   | x |
| FGF-19        | Fibroblast growth factor 19                      | -                              |   | x |
| FGF-basic     | Fibroblast growth-factor                         | FGF-2                          |   | x |
| Flt-3 Ligand  | Fms-related tyrosine kinase 3 ligand             | FLT3LG                         |   | x |
| G-CSF         | Granulocyte colony-stimulating factor            | CSF3                           |   | x |
| GDF-15        | Growth/differentiation factor 15                 | MIC-1                          |   | x |
| GH            | Growth hormone                                   | Somatotropin                   |   | x |
| GM-CSF        | Granulocyte macrophage colony-stimulating factor | CSF2                           |   | x |
| CXCL1         | Chemokine (C-X-C motif) ligand 1 (CXCL1)         | GRO $\alpha$ , MSGA- $\alpha$  | x | x |
| HGF           | Hepatocyte growth factor                         | Scatter factor, SF             |   | x |
| ICAM-1        | Intercellular Adhesion Molecule 1                | CD54                           |   | x |
| IFN- $\gamma$ | Interferon gamma                                 | IFNG                           |   | x |
| IGFBP-2       | Insulin-like growth factor-binding protein 2     | -                              |   | x |
| IGFBP-3       | Insulin-like growth factor-binding protein 3     | -                              |   | x |
| IL-10         | Interleukin-10                                   | -                              | x | x |
| IL-11         | Interleukin-11                                   | -                              |   | x |
| IL-12p70      | Interleukin-12p70                                | -                              |   | x |
| IL-13         | Interleukin-13                                   | -                              |   | x |
| IL-15         | Interleukin-15                                   | -                              |   | x |
| IL-16         | Interleukin-16                                   | -                              |   | x |
| IL-17A        | Interleukin-17A                                  | -                              |   | x |
| IL-18 BP      | Interleukin-18 binding protein                   | IL-17, CTLA8                   |   | x |
| IL-19         | Interleukin-19                                   | -                              |   | x |
| IL-1 $\alpha$ | Interleukin-1 alpha                              | IL-F1                          |   | x |
| IL-1 $\beta$  | Interleukin-1 beta                               | IL-F2                          |   | x |
| IL-1RA        | Interleukin-1 receptor antagonist                | IL-F3                          | x | x |
| IL-2          | Interleukin-2                                    | -                              |   | x |
| IL-22         | Interleukin-22                                   | IL-TIF                         |   | x |
| IL-23         | Interleukin-23                                   | IL-23A, SGRF                   |   | x |
| IL-24         | Interleukin-24                                   | C49A, FISP, MDA-7, MOB-5, ST16 |   | x |
| IL-27         | Interleukin-27                                   | -                              |   | x |
| IL-3          | Interleukin-3                                    | -                              |   | x |

|                               |                                                   |                                |   |   |
|-------------------------------|---------------------------------------------------|--------------------------------|---|---|
| IL-31                         | Interleukin-31                                    | -                              |   | x |
| IL-32                         | Interleukin-32                                    | -                              |   | x |
| IL-33                         | Interleukin-33                                    | C9orf26, DVS27, NF-HEV         |   | x |
| IL-34                         | Interleukin-34                                    | C16orf77                       |   | x |
| IL-4                          | Interleukin-4                                     | -                              |   | x |
| IL-5                          | Interleukin-5                                     | -                              |   | x |
| IL-6                          | Interleukin-6                                     | -                              | x | x |
| IL-8                          | Interleukin-8                                     | CXCL8                          |   | x |
| IP-10                         | Interferon gamma-induced protein 10               | CXCL10                         |   | x |
| I-TAC                         | Interferon-inducible T-cell alpha chemoattractant | CXCL11, SYCB9B                 |   | x |
| Leptin                        | -                                                 | OB                             |   | x |
| LIF                           | Leukemia inhibitory factor                        | -                              |   | x |
| NGAL                          | Neutrophil gelatinase-associated lipocalin        | Lipocalin-2, LCN2, Siderocalin | x | x |
| MCP-1                         | Monocyte chemoattractant protein-1                | CCL2, MCAF                     | x | x |
| MCP-3                         | Monocyte chemoattractant protein 3                | CCL7, MARC                     |   | x |
| M-CSF                         | Macrophage colony-stimulating factor              | CSF1                           |   | x |
| MIF                           | Macrophage migration inhibitory factor            | -                              |   | x |
| MIG                           | Monokine induced by gamma interferon              | CXCL9                          |   | x |
| MIP-1 $\alpha$ /MIP-1 $\beta$ | Macrophage inflammatory proteins 1 alpha /1 beta  | CCL3/CCL4                      |   | x |
| MIP-3 $\alpha$                | Macrophage inflammatory protein 3 alpha           | CCL20, Exodus-1, LARC          |   | x |
| MIP-3 $\beta$                 | Macrophage inflammatory protein 3 beta            | CCL19, ELC                     |   | x |
| MMP-9                         | Matrix metalloproteinase 9                        | CLG4B, Gelatinase B            | x | x |
| Myeloperoxidase               | -                                                 | MPO, Lactoperoxidase           |   | x |
| Neprilysin                    | -                                                 | CD10                           | x |   |
| Osteopontin                   | -                                                 | OPN                            |   | x |
| PDGF-AA                       | Platelet-derived growth factor AA                 | -                              |   | x |
| PDGF-AA/BB                    | Platelet-derived growth factor AA/BB              | -                              |   | x |
| Pentraxin 3                   | -                                                 | PTX3, TSG-14                   |   | x |
| PF4                           | Platelet factor 4                                 | CXCL4                          |   | x |
| PSA                           | Prostate-specific antigen                         | KLK-3                          | x | x |
| RAGE                          | Receptor for advanced glycation endproducts       | AGER                           | x | x |

|                  |                                                                     |                             |   |   |
|------------------|---------------------------------------------------------------------|-----------------------------|---|---|
| RANTES           | Regulated on activation,<br>normal T cell expressed and<br>secreted | CCL5                        |   | x |
| RBP-4            | Retinol Binding Protein 4                                           | -                           | x | x |
| Relaxin-2        | -                                                                   | RLN2, RLXH2                 |   | x |
| Renin            | -                                                                   | Angiotensinogenase          | x |   |
| Resistin         | -                                                                   | ADSF, FIZZ3, RETN           | x | x |
| SCF              | Stem cell factor                                                    | -                           | x |   |
| SDF-1 $\alpha$   | Stromal cell-derived factor 1<br>alpha                              | CXCL12, PBSF                |   | x |
| Serpin A3        | -                                                                   | $\alpha$ 1-antichymotrypsin | x |   |
| Serpin E1        | -                                                                   | PAI-I, PAI-1, Nexin         |   | x |
| SHBG             | Sex hormone binding globulin                                        | ABP                         |   | x |
| ST2              | Suppression of tumorigenicity<br>2                                  | IL-1 R4, IL1RL1, ST2L       |   | x |
| TARC             | Thymus- and activation-<br>regulation chemokine                     | CCL17                       |   | x |
| TfR              | Transferrin                                                         | CD71, TFR1, TFRC, TRFR      |   | x |
| TGF- $\alpha$    | Transforming growth factor<br>alpha                                 | TGFA                        |   | x |
| Thrombospondin-1 | -                                                                   | THBS1, TSP-1                | x | x |
| KIM-1            | Kidney injury molecule 1                                            | TIM-1, HAVCR                | x |   |
| TIM-3            | T-cell immunoglobulin and<br>mucin-domain containing-3              | HAVCR2                      |   | x |
| TNF R1           | Tumour necrosis factor<br>receptor 1                                | TNFRSF1A                    | x |   |
| TNF- $\alpha$    | Tumour necrosis factor alpha                                        | TNFSF1A                     | x | x |
| TFF3             | Trefoil Factor 3                                                    | ITF, TFI                    | x | x |
| TWEAK            | Tumor necrosis factor-like<br>weak inducer of apoptosis             | TNFSF12                     | x |   |
| uPA              | Urokinase-type plasminogen<br>activator                             | Urokinase                   | x |   |
| uPAR             | Urokinase plasminogen<br>activator receptor                         | PLAUR                       |   | x |
| VCAM-1           | Vascular cell adhesion<br>molecule 1                                | CD106                       | x | x |
| VEGF             | Vascular endothelial growth<br>factor                               | VPF                         |   | x |
| VEGF-A           | Vascular endothelial growth<br>factor-A                             | VPF-A                       | x |   |
| Vitamin D BP     | Vitamin D Binding Protein                                           | VDB, DBP, VDBP              |   | x |

*Table S2: Full results: Human Kidney Biomarker Array Kit*

| Protein          | IgAVN vs IgAVwoN |          | IgAVN vs HC |          | IgAVwoN vs HC |          |
|------------------|------------------|----------|-------------|----------|---------------|----------|
|                  | Fold-change      | p-value  | Fold-change | p-value  | Fold-change   | p-value  |
| Adiponectin      | 2.9919           | 0.57799  | 4.3938      | 0.27887  | 1.4686        | 0.32622  |
| Angiotensinogen  | 6.4865           | 0.0096   | 22.603      | 0.007151 | 3.4846        | 0.054706 |
| Annexin V        | 3.1693           | 0.45212  | 4.5046      | 0.37053  | 1.4213        | 0.90716  |
| ANPEP            | 1.6726           | 0.93273  | 2.8759      | 0.47447  | 1.7194        | 0.2887   |
| β2 microglobulin | 1.1466           | 0.93184  | 3.1066      | 0.24131  | 2.7093        | 0.18944  |
| Clusterin        | 1.7263           | 0.73026  | 3.8383      | 0.85582  | 2.2235        | 0.10659  |
| CXCL16           | 3.728            | 0.013325 | 4.4656      | 0.013257 | 1.1979        | 0.58787  |
| Cyr61            | 1.9483           | 0.5891   | 3.9752      | 0.41352  | 2.0403        | 0.83646  |
| Cystacin-C       | 1.1894           | 0.97656  | 2.8185      | 0.29247  | 2.3698        | 0.17507  |
| DPPIV            | 1.7591           | 0.61695  | 3.0626      | 0.19653  | 1.741         | 0.15967  |
| EGF              | 1.0829           | 0.93131  | 3.0313      | 0.22998  | 2.7992        | 0.20843  |
| EGF-R            | 5.8432           | 0.00232  | 7.8429      | 0.000424 | 1.3422        | 0.56969  |
| FABP1            | 2.1775           | 0.44138  | 5.8558      | 0.13951  | 2.6892        | 0.42364  |
| Fetuin-A         | 1.0103           | 0.62367  | 2.738       | 0.85618  | 2.71          | 0.1657   |
| CXCL1            | 1.7859           | 0.53345  | 4.9731      | 0.20574  | 2.7846        | 0.53907  |
| IL-10            | 1.5736           | 0.65926  | 4.8126      | 0.34642  | 3.0583        | 0.64184  |
| IL-1RA           | 5.6892           | 0.12162  | 4.8312      | 0.095243 | 0.84918       | 0.51867  |
| IL-6             | 2.5843           | 0.19587  | 5.5279      | 0.036444 | 2.139         | 0.49628  |
| KIM-1            | 4.0891           | 0.003826 | 4.1496      | 0.00115  | 1.0148        | 0.93212  |
| NGAL             | 1.1769           | 0.34533  | 1.8393      | 0.16901  | 1.5629        | 0.71228  |
| MCP-1            | 3.3959           | 0.046906 | 11.956      | 0.001066 | 3.5206        | 0.001091 |
| MMP-9            | 0.5616           | 0.93974  | 2.6748      | 0.42349  | 4.7628        | 0.45181  |
| Neprilysin       | 1.7023           | 0.48842  | 2.3959      | 0.19983  | 1.4075        | 0.322    |
| PSA              | 1.2936           | 0.7259   | 3.9295      | 0.45469  | 3.0377        | 0.71787  |
| RAGE             | 0.82103          | 0.85485  | 1.689       | 0.50084  | 2.0571        | 0.40355  |
| RBP4             | 1.0095           | 0.82887  | 2.2656      | 0.32605  | 2.2444        | 0.12205  |
| Renin            | 1.2747           | 0.71454  | 3.7978      | 0.40608  | 2.9795        | 0.68952  |
| Resistin         | 0.95591          | 0.9099   | 1.1464      | 0.40525  | 1.1993        | 0.44064  |
| SCF              | 1.8794           | 0.3667   | 5.3492      | 0.19574  | 2.8463        | 0.98275  |
| Serpin_A3        | 1.8348           | 0.9453   | 7.0708      | 0.40647  | 3.8537        | 0.2036   |
| TFF3             | 1.1309           | 0.93257  | 2.8717      | 0.25503  | 2.5394        | 0.21273  |
| Thrombospondin-1 | 1.383            | 0.71873  | 3.6518      | 0.39685  | 2.6405        | 0.67322  |
| TNF-R1           | 0.9231           | 0.74193  | 1.7886      | 0.36378  | 1.9376        | 0.17036  |
| TNF-α            | 1.6373           | 0.44583  | 2.6742      | 0.36577  | 1.6333        | 0.96245  |
| TWEAK            | 2.4252           | 0.5586   | 4.1908      | 0.49631  | 1.728         | 0.96588  |
| uPA              | 1.2215           | 0.88152  | 3.0317      | 0.20082  | 2.482         | 0.15934  |
| VCAM-1           | 2.5729           | 0.22071  | 4.0982      | 0.15574  | 1.5928        | 0.3686   |
| VEGF             | 1.2105           | 0.40523  | 1.5217      | 0.14103  | 1.257         | 0.34796  |

*Table S3: Full results: Human XL Cytokine Array Kit*

| Protein            | IgAVN vs IgAVwoN |          | IgAVN vs HC |          | IgAVwoN vs HC |          |
|--------------------|------------------|----------|-------------|----------|---------------|----------|
|                    | Fold-change      | p-value  | Fold-change | p-value  | Fold-change   | p-value  |
| Adiponectin        | 1.8287           | 0.57097  | 3.2492      | 0.17803  | 1.7768        | 0.21624  |
| Angiogenin         | 1.6477           | 0.33875  | 2.212       | 0.11892  | 1.3425        | 0.13731  |
| Angiopoietin-1     | 1.4268           | 0.32607  | 3.4687      | 0.033806 | 2.4312        | 0.35446  |
| Angiopoietin-2     | 1.1577           | 0.7162   | 3.2967      | 0.05545  | 2.8476        | 0.12544  |
| Apolipoprotein A 1 | 6.0461           | 0.020463 | 5.9723      | 0.034772 | 0.98779       | 0.58263  |
| BAFF               | 9.7227           | 0.026053 | 26.468      | 0.003899 | 2.7223        | 0.078796 |
| BDNF               | 1.0461           | 0.75692  | 2.6174      | 0.019991 | 2.502         | 0.063713 |
| C5/C5a             | 4.5968           | 0.032956 | 6.5258      | 0.011829 | 1.4196        | 0.63215  |
| CD14               | 2.0131           | 0.3988   | 2.9582      | 0.1626   | 1.4695        | 0.28197  |
| CD30               | 0.52959          | 0.12288  | 0.75429     | 0.49646  | 1.4243        | 0.23274  |
| CD31               | 0.86691          | 0.62807  | 1.7843      | 0.10109  | 2.0583        | 0.062136 |
| CD40_Ligand        | 3.0402           | 0.044625 | 7.1976      | 0.007591 | 2.3675        | 0.070268 |
| Chitinase 3-like 1 | 0.86917          | 0.75871  | 2.4447      | 0.10388  | 2.8127        | 0.37182  |
| CFD                | 2.6001           | 0.008623 | 3.4104      | 0.004554 | 1.3116        | 0.40523  |
| Cripto-1           | 7.8132           | 0.014841 | 7.1403      | 0.026301 | 0.91387       | 0.86666  |
| CRP                | 2.4108           | 0.2663   | 3.0548      | 0.18704  | 1.2671        | 0.89643  |
| Cystatin-C         | 1.2067           | 0.29366  | 1.1915      | 0.40639  | 0.98741       | 0.82491  |
| Dkk-1              | 1.1093           | 0.56197  | 2.5345      | 0.011049 | 2.2847        | 0.1296   |
| DPPIV              | 3.1747           | 0.1454   | 4.0274      | 0.075809 | 1.2686        | 0.4476   |
| EGF                | 1.0446           | 0.9617   | 2.728       | 0.26843  | 2.6115        | 0.23998  |
| EMMPRIN            | 1.0361           | 0.99501  | 2.001       | 0.25474  | 1.9313        | 0.21085  |
| ENA-78             | 3.7452           | 0.058576 | 7.4035      | 0.015579 | 1.9768        | 0.11815  |
| Endoglin           | 1.7528           | 0.020648 | 2.7075      | 0.014267 | 1.5447        | 0.19651  |
| Fas Ligand         | 2.0645           | 0.086281 | 3.757       | 0.007516 | 1.8198        | 0.29808  |
| FGF-19             | 1.5387           | 0.42579  | 3.2109      | 0.070494 | 2.0868        | 0.21824  |
| FGF-7              | 1.4476           | 0.44304  | 2.9148      | 0.067729 | 2.0136        | 0.27496  |
| FGF-basic          | 1.5811           | 0.29393  | 2.9534      | 0.068045 | 1.8679        | 0.50599  |
| Flt-3 ligand       | 1.6921           | 0.13051  | 2.7008      | 0.018979 | 1.5961        | 0.22565  |
| G-CSF              | 1.5053           | 0.21954  | 3.577       | 0.003326 | 2.3763        | 0.18161  |
| GDF-15             | 1.5685           | 0.71341  | 2.3347      | 0.28713  | 1.4885        | 0.20007  |
| GH                 | 2.5913           | 0.067259 | 6.2705      | 0.003865 | 2.4198        | 0.017402 |
| GM-CSF             | 1.4378           | 0.23444  | 3.2279      | 0.016377 | 2.245         | 0.3229   |
| CXCL1              | 2.0059           | 0.022027 | 4.2743      | 0.000116 | 2.1309        | 0.016553 |
| HGF                | 1.8013           | 0.02783  | 4.2975      | 0.00116  | 2.3858        | 0.019725 |
| ICAM-1             | 4.0385           | 0.011899 | 10.249      | 6.39E-05 | 2.5377        | 0.14455  |
| IFN-γ              | 1.2014           | 0.60944  | 3.2454      | 0.030262 | 2.7014        | 0.13751  |
| IGFBP-2            | 1.7674           | 0.20262  | 4.8827      | 0.010683 | 2.7627        | 0.30689  |
| IGFBP-3            | 3.4145           | 0.022753 | 10.73       | 2.13E-05 | 3.1426        | 0.11542  |
| IL-10              | 1.6549           | 0.28815  | 3.3107      | 0.032085 | 2.0006        | 0.20312  |
| IL-11              | 1.5168           | 0.44203  | 2.8766      | 0.098683 | 1.8965        | 0.30443  |

|                               |         |          |        |          |        |          |
|-------------------------------|---------|----------|--------|----------|--------|----------|
| IL-12p70                      | 1.0739  | 0.81759  | 3.0354 | 0.067595 | 2.8266 | 0.1222   |
| IL-13                         | 1.2101  | 0.60282  | 3.4298 | 0.016215 | 2.8343 | 0.049089 |
| IL-15                         | 1.4094  | 0.28861  | 3.153  | 0.01116  | 2.2371 | 0.18352  |
| IL-16                         | 1.2732  | 0.37424  | 2.7409 | 0.016    | 2.1528 | 0.27178  |
| IL-17a                        | 1.2603  | 0.87964  | 2.0202 | 0.31992  | 1.603  | 0.27878  |
| IL-18 BP                      | 1.0733  | 0.97381  | 2.6403 | 0.27038  | 2.4599 | 0.21658  |
| IL-19                         | 1.5401  | 0.31964  | 3.8165 | 0.008649 | 2.4781 | 0.029131 |
| IL-1 $\alpha$                 | 0.86362 | 0.87519  | 2.5854 | 0.10271  | 2.9936 | 0.084115 |
| IL-1 $\beta$                  | 1.0638  | 0.72184  | 2.5271 | 0.0826   | 2.3755 | 0.21056  |
| IL-1RA                        | 1.2221  | 0.97565  | 2.3637 | 0.23858  | 1.9341 | 0.10512  |
| IL-2                          | 1.215   | 0.56018  | 2.6339 | 0.11002  | 2.1679 | 0.35638  |
| IL-22                         | 1.834   | 0.24804  | 4.4014 | 0.019852 | 2.3998 | 0.052279 |
| IL-23                         | 1.3567  | 0.4313   | 3.2976 | 0.02441  | 2.4307 | 0.16244  |
| IL-24                         | 1.2106  | 0.50425  | 3.1891 | 0.018619 | 2.6344 | 0.14649  |
| IL-27                         | 1.133   | 0.57041  | 3.2683 | 0.022913 | 2.8847 | 0.15347  |
| IL-3                          | 1.1007  | 0.57302  | 3.8068 | 0.074403 | 3.4585 | 0.32704  |
| IL-31                         | 1.3794  | 0.37148  | 3.2694 | 0.015051 | 2.3702 | 0.14672  |
| IL-32                         | 1.0852  | 0.55789  | 3.5242 | 0.004058 | 3.2475 | 0.079091 |
| IL-33                         | 1.3956  | 0.36308  | 3.7335 | 0.006638 | 2.6752 | 0.11432  |
| IL-34                         | 1.1551  | 0.55351  | 2.5888 | 0.025418 | 2.2413 | 0.20391  |
| IL-4                          | 1.989   | 0.077582 | 4.6257 | 0.003759 | 2.3257 | 0.035862 |
| IL-5                          | 2.029   | 0.046712 | 4.611  | 0.00292  | 2.2726 | 0.015636 |
| IL-6                          | 1.7949  | 0.29276  | 3.2726 | 0.051585 | 1.8233 | 0.19671  |
| IL-8                          | 1.9038  | 0.11659  | 2.8859 | 0.038825 | 1.5159 | 0.80768  |
| IP-10                         | 1.7876  | 0.12758  | 2.8273 | 0.022831 | 1.5816 | 0.12661  |
| I-TAC                         | 1.2475  | 0.37007  | 2.8928 | 0.008766 | 2.319  | 0.2042   |
| PSA                           | 1.0379  | 0.88677  | 2.5245 | 0.068415 | 2.4323 | 0.090241 |
| Leptin                        | 1.6779  | 0.2682   | 4.3158 | 0.00938  | 2.5722 | 0.022296 |
| LIF                           | 2.4099  | 0.00752  | 5.5375 | 0.001362 | 2.2978 | 0.06466  |
| NGAL                          | 1.0664  | 0.4986   | 2.063  | 0.10666  | 1.9345 | 0.77922  |
| MCP-1                         | 1.8851  | 0.06115  | 4.1117 | 0.00577  | 2.1812 | 0.13351  |
| MCP-3                         | 1.3311  | 0.37702  | 3.2094 | 0.016332 | 2.4111 | 0.17594  |
| M-CSF                         | 1.1701  | 0.28417  | 1.7828 | 0.08188  | 1.5236 | 0.1689   |
| MIF                           | 2.1612  | 0.015038 | 3.1333 | 0.006118 | 1.4498 | 0.29744  |
| MIG                           | 1.701   | 0.10966  | 3.8285 | 0.000975 | 2.2508 | 0.2024   |
| MIP-1 $\alpha$ /MIP-1 $\beta$ | 1.4109  | 0.27706  | 2.5586 | 0.013899 | 1.8134 | 0.31822  |
| MIP-3 $\alpha$                | 1.3186  | 0.34885  | 2.5306 | 0.017659 | 1.9192 | 0.2996   |
| MIP-3 $\beta$                 | 0.92472 | 0.48424  | 3.488  | 0.012799 | 3.7719 | 0.32589  |
| MMP-9                         | 0.7438  | 0.72013  | 1.6703 | 0.087044 | 2.2456 | 0.49677  |
| Myeloperoxidase               | 0.42741 | 0.3448   | 3.7338 | 0.059293 | 8.7358 | 0.88862  |
| Osteopontin                   | 1.2659  | 0.84319  | 2.1902 | 0.53528  | 1.7301 | 0.19047  |
| PDGF-AA                       | 0.95234 | 0.73517  | 2.2445 | 0.027002 | 2.3568 | 0.11891  |
| PDGF-AA/BB                    | 1.4861  | 0.23584  | 4.2025 | 0.007355 | 2.8278 | 0.13029  |
| Pentraxin-3                   | 1.1424  | 0.73195  | 3.0177 | 0.035324 | 2.6416 | 0.072243 |



|                  |         |          |        |          |         |          |
|------------------|---------|----------|--------|----------|---------|----------|
| PF4              | 2.8905  | 0.26081  | 7.528  | 0.035516 | 2.6044  | 0.16161  |
| RAGE             | 0.61426 | 0.39621  | 1.2002 | 0.66954  | 1.954   | 0.27215  |
| RANTES           | 1.9093  | 0.12788  | 4.4314 | 0.010905 | 2.321   | 0.1824   |
| RBP-4            | 1.3193  | 0.70566  | 2.249  | 0.17302  | 1.7047  | 0.18646  |
| Relaxin-2        | 1.2276  | 0.51042  | 2.909  | 0.048065 | 2.3697  | 0.26231  |
| Resistin         | 1.5577  | 0.31074  | 1.4971 | 0.3415   | 0.96111 | 0.83688  |
| SDF-1a           | 1.2941  | 0.2665   | 1.9324 | 0.070332 | 1.4933  | 0.23185  |
| Serpin E1        | 2.491   | 0.033753 | 8.1136 | 9.91E-05 | 3.2572  | 0.069064 |
| SHBG             | 7.5808  | 0.007742 | 13.339 | 0.00358  | 1.7595  | 0.24373  |
| ST2              | 3.3299  | 0.014425 | 8.1713 | 0.000415 | 2.4539  | 0.082604 |
| TARC             | 1.4684  | 0.33971  | 4.1432 | 0.010824 | 2.8215  | 0.073098 |
| TFF3             | 1.0261  | 0.99463  | 2.7465 | 0.26291  | 2.6768  | 0.20413  |
| TfR              | 1.9306  | 0.086845 | 5.6231 | 0.000308 | 2.9126  | 0.05055  |
| TGF- $\alpha$    | 0.8594  | 0.92868  | 2.2638 | 0.027643 | 2.6341  | 0.15107  |
| Thrombospondin-1 | 0.91736 | 0.78108  | 2.6222 | 0.029302 | 2.8584  | 0.153    |
| TIM-3            | 1.117   | 0.99997  | 2.6252 | 0.27146  | 2.3503  | 0.18122  |
| TNF- $\alpha$    | 1.1218  | 0.46899  | 2.3231 | 0.023407 | 2.0709  | 0.3851   |
| uPAR             | 0.76021 | 0.44874  | 1.3151 | 0.33489  | 1.7299  | 0.15929  |
| VCAM-1           | 2.3545  | 0.2753   | 4.2414 | 0.096912 | 1.8014  | 0.1735   |
| VEGF             | 1.0948  | 0.79309  | 1.5399 | 0.22317  | 1.4066  | 0.28407  |
| Vitamin D BP     | 2.5958  | 0.33743  | 4.3044 | 0.10077  | 1.6582  | 0.10032  |
